# Supplementary material
Source: HighWire-hosted journal article supplement (https://bjo.bmj.com/content/107/8/1125)
Supplement: inline-supplementary-material-2 [file inline-supplementary-material-2.pdf]

**Supplementary Table 1. Linear associations of anterior chamber depth and lens thickness with different perinatal parameters (n = 438) for the sample of the Gutenberg Prematurity Eye Study (GPES).**

|                                    | univariate             |        |
|------------------------------------|------------------------|--------|
|                                    | B [95% CI]             | p      |
| <b>Anterior chamber depth (mm)</b> |                        |        |
| Gestational age (weeks)            | 0.001 (-0.007; 0.009)  | 0.76   |
| Birth weight (kg)                  | 0.001 (-0.034; 0.036)  | 0.95   |
| Birth weight percentile            | 0.000 (-0.001; 0.002)  | 0.74   |
| ROP (yes)                          | -0.11 (-0.25; 0.02)    | 0.10   |
| ROP treatment (yes)                | -0.63 (-0.98; -0.27)   | 0.001  |
| Placental insufficiency (yes)      | -0.04 (-0.15; 0.07)    | 0.46   |
| Preeclampsia (yes)                 | -0.07 (-0.16; 0.02)    | 0.12   |
| Breastfeeding (yes)                | 0.06 (-0.006; 0.127)   | 0.08   |
| Smoking pregnancy (yes)            | 0.02 (-0.10; 0.14)     | 0.71   |
| <b>Lens thickness (mm)</b>         |                        |        |
| Gestational age (weeks)            | 0.003 (-0.004; 0.009)  | 0.45   |
| Birth weight (kg)                  | 0.010 (-0.023; 0.042)  | 0.56   |
| Birth weight percentile            | 0.000 (-0.001; 0.001)  | 0.78   |
| ROP (yes)                          | -0.04 (-0.16; 0.07)    | 0.47   |
| ROP treatment (yes)                | 0.64 (0.31; 0.97)      | <0.001 |
| Placental insufficiency (yes)      | -0.003 (-0.102; 0.097) | 0.96   |
| Preeclampsia (yes)                 | 0.010 (-0.06; 0.07)    | 0.89   |
| Breastfeeding (yes)                | -0.10 (-0.17; -0.04)   | 0.001  |
| Smoking pregnancy (yes)            | -0.05 (-0.18; 0.07)    | 0.39   |

B – Beta; ROP – Retinopathy of prematurity; GA – gestational age; kg – kilogram; CI – Confidence interval; mm – millimeter

Linear regression analysis using generalized estimating equations to control for correlations between right and left eyes.
